# Supplementary material for: Investigation of high performance TiO2nanorod array perovskite solar cells
Source: Royal Society of Chemistry journal article supplement (doi:10.1039/c7ta03710d), 2017-01-01
Supplement: c7ta03710d1.pdf [file c7ta03710d1.pdf]

## Supporting Information

### **Investigation of High Performance TiO<sub>2</sub> Nanorod Array Perovskite Solar Cells**

*Changwen Liu,<sup>a</sup> Ruixue Zhu,<sup>b</sup> Annie Ng,<sup>a</sup> Zhiwei Ren,<sup>a</sup> Sin Hang Cheung,<sup>c</sup> Lili Du,<sup>b</sup> Shu Kong So,<sup>c</sup> Juan Antonio Zapien,<sup>d</sup> Aleksandra B. Djurišić,<sup>e</sup> David Lee Phillips<sup>b,\*</sup>, and Charles Surya<sup>a,\*</sup>*

<sup>a</sup>*Department of Electronic and Information Engineering, The Hong Kong Polytechnic University, Hong Kong S.A.R.*

<sup>b</sup>*Department of Chemistry, The University of Hong Kong, Pokfulam Road, Hong Kong S.A.R.*

<sup>c</sup>*Department of Physics Hong Kong Baptist University, Hong Kong S.A.R.*

<sup>d</sup>*Department of Department of Physics and Materials Science, City University of Hong Kong, Hong Kong S.A.R.*

<sup>e</sup>*Department of Physics, The University of Hong Kong, Pokfulam Road, Hong Kong S.A.R.*

\* *Co-correspondence authors emails: [charles.surya@polyu.edu.hk](mailto:charles.surya@polyu.edu.hk), [phillips@hku.hk](mailto:phillips@hku.hk)*

†

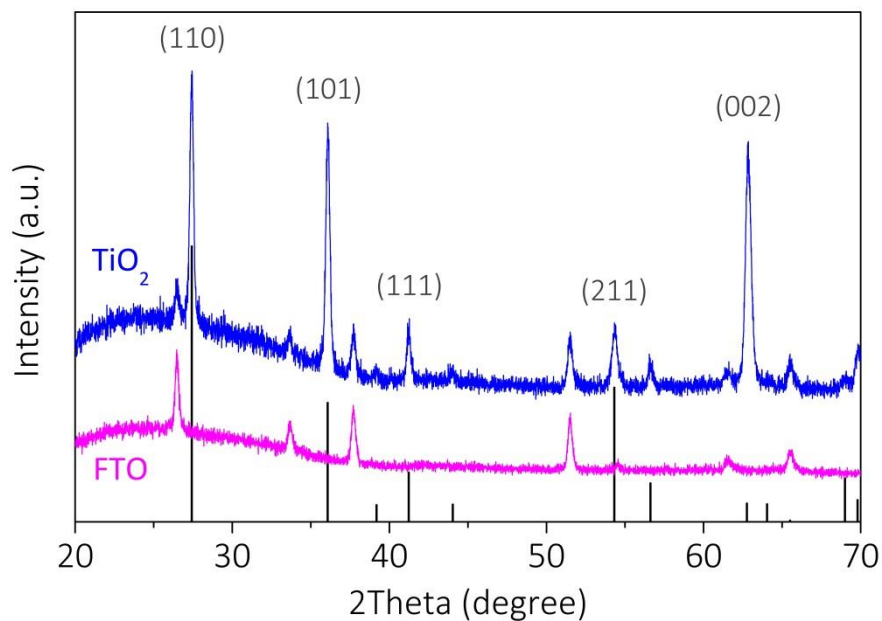

**Figure S1.** XRD patterns of FTO and  $\text{TiO}_2$ -NA synthesized by solvothermal reaction at 180 °C for 120 min. The vertical lines show the XRD pattern of rutile  $\text{TiO}_2$  (JCPDS 86-0147).

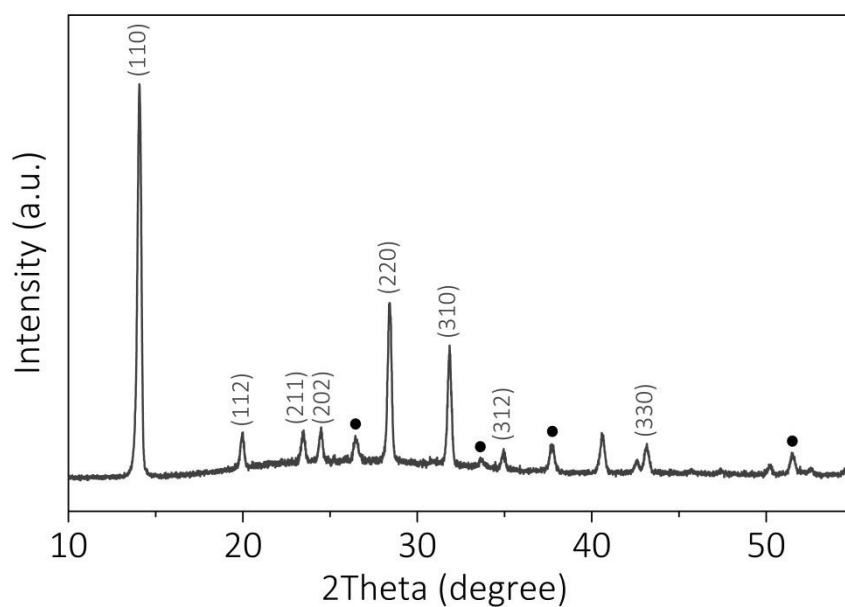

**Figure S2.** XRD pattern of  $\text{TiO}_2$ -P0 sample. The symbol “●” identifies the diffraction peaks of FTO, and the indices of crystal face are assigned to crystal planes of  $\text{CH}_3\text{NH}_3\text{PbI}_3$ .

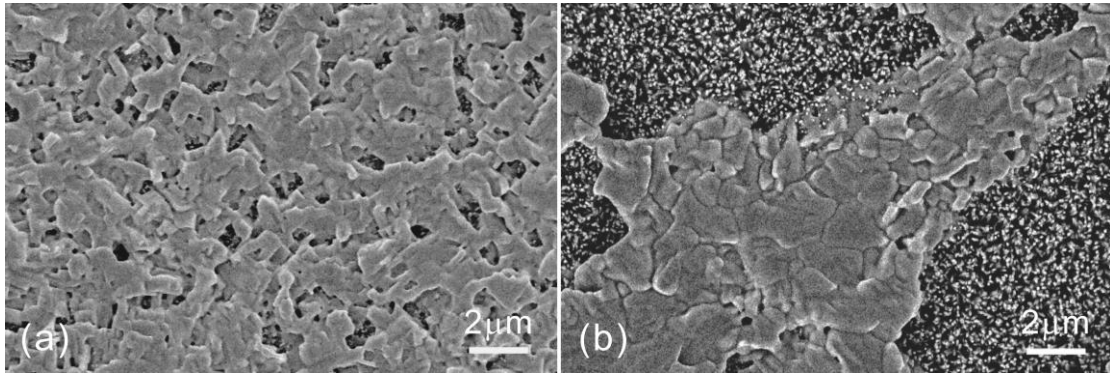

**Figure S3.** SEM images of TiO<sub>2</sub>-NA/perovskite samples by using precursor with the molar ratio MAI/MAI = 1.5, (a) without DMSO in the precursor but with toluene dripping, and (b) with DMSO in the precursor but without toluene dripping.

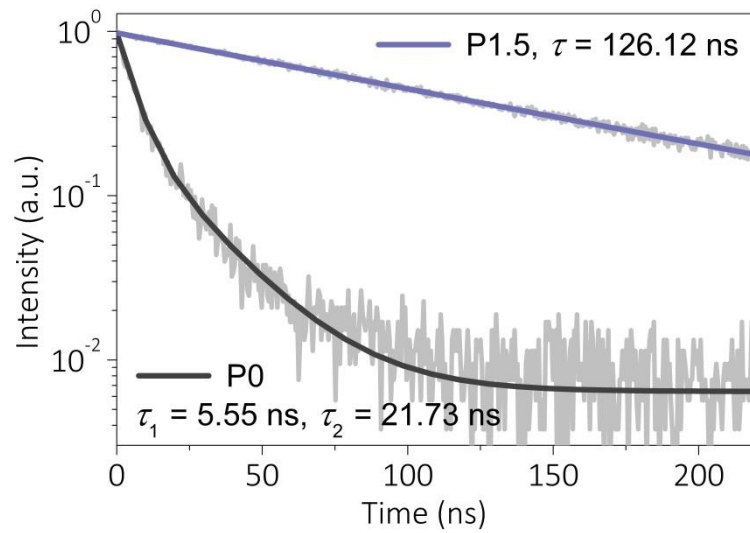

**Figure S4.** The results of TRPL for the sample P0 and P1.5.

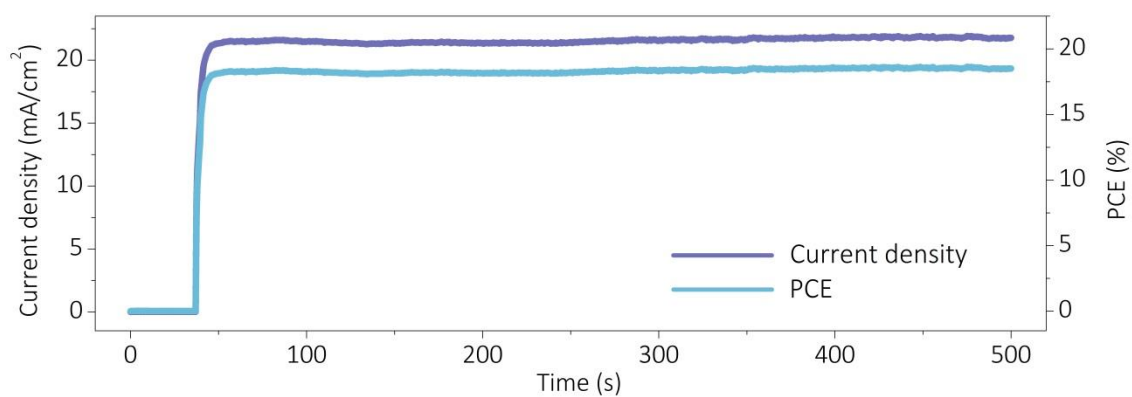

**Figure S5.** Photocurrent density and PCE as a function of time for a typical  $\text{TiO}_2\text{-P1.5}$  device biased at 0.85 V under AM 1.5G illumination ( $100 \text{ mW/cm}^2$ ).

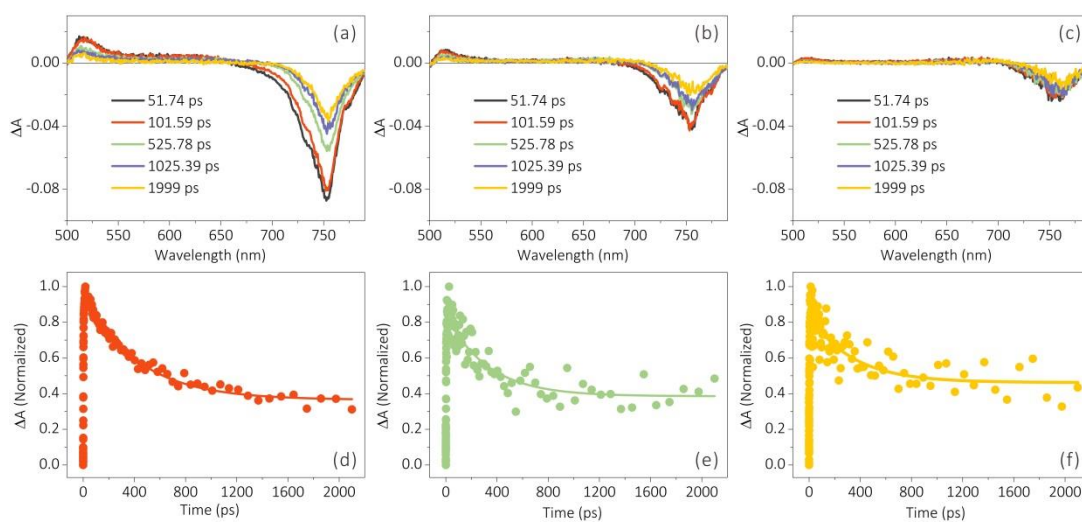

**Figure S6.** (a, b, c) fs-TA spectra and (d, e, f) corresponding band edge transition kinetics of (a, d)  $\text{TiO}_2\text{-P0.5}$ , (b, e)  $\text{TiO}_2\text{-P1}$ , and (c, f)  $\text{TiO}_2\text{-P2}$  samples.

**Table S1.** Summary of the fitted parameters.

|                        | <b>A<sub>1</sub></b> | <b><math>\tau_1</math> (ps)</b> | <b>A<sub>2</sub></b> | <b>*<math>\tau_2</math> (ps)</b> |
|------------------------|----------------------|---------------------------------|----------------------|----------------------------------|
| TiO <sub>2</sub> -P0   | 0.39                 | 813                             | 0.35                 | 92                               |
| TiO <sub>2</sub> -P0.5 | 0.60                 | 420                             | N/A                  | N/A                              |
| TiO <sub>2</sub> -P1   | 0.46                 | 324                             | N/A                  | N/A                              |
| TiO <sub>2</sub> -P1.5 | 0.51                 | 317                             | N/A                  | N/A                              |
| TiO <sub>2</sub> -P2   | 0.38                 | 336                             | N/A                  | N/A                              |
| CL-P1.5                | 0.61                 | 436                             | N/A                  | N/A                              |

\*It may contain the artifact due to strong fluorescence scattering in the sample<sup>1,2</sup>

#### References

1. B. Giovani, M. Byrdin, M. Ahmad and K. Brettel, *Nat. Struct. Mol. Biol.* **2003**, *10*, 489.
2. K. Pydzińska, J. Karolczak, I. Kosta, R. Tena Zaera, A. Todinova, J. Idígoras, J. A. Anta and M. Ziólek, *ChemSusChem* **2016**, *9*, 1647.
